# Supplementary material for: Analysis of Nuclear Dynamics in Nematode-Trapping Fungi Based on Fluorescent Protein Labeling
Source: MDPI journal article supplement (doi:10.3390/jof9121183), 2023-12-11
Supplement: s1 [file s1]

# 1. Supplementary tables

**Table S1.** Primers used in this study.

| primers                        | Paired sequences                                          | Purpose                             |
|--------------------------------|-----------------------------------------------------------|-------------------------------------|
| H <sub>2</sub> BGFP_pjet/LB_F1 | GATCTTCCGGATGGCTCGAGGATGGATTGGAGTAGGTTTGGTG               | Verification of construction vector |
| H <sub>2</sub> BGFP_GFP/LB_R1  | GCTCCTCGCCCTTGCTCACCATGGCGCGCCTTTGGCAGACGAAGATGAAT<br>ACT |                                     |
| H <sub>2</sub> BGFP_LB/GFP_F2  | ATTCATCTTCGTCTGCCAAAAGGCGGCCATGGTGAGCAAGGGCGAGGAG         | Verification of construction vector |
| H <sub>2</sub> BGFP_hph/GFP_R2 | GACCTCCACTAGCATTACACTTCTACTTGTACAGCTCGTCCATG              |                                     |
| H <sub>2</sub> BGFP_GFP/hph_F3 | GGACGAGCTGTACAAGTAGAAGTGTAATGCTAGTGGAGGTCAACA             | Verification of construction vector |
| H <sub>2</sub> BGFP_RB/hph_R3  | GAAACCAAAAAAATAATACGCTGGGGGGAGTTTAGGGAAAGAGC              |                                     |
| H <sub>2</sub> BGFP_hph/RB_F4  | CCTAAACTCCCCCAGCGTATTAAGTTTTTTGGTTTCGC                    | Verification of construction vector |
| H <sub>2</sub> BGFP_pjet/RB_R4 | ATTGTAGGAGATCTTCTAGAGTGCAACTTAAACCCTCCGAAG                |                                     |
| H <sub>2</sub> B-YZ-F          | CCGAACAGAATTTAATCTGA                                      | Verification of construction vector |
| H <sub>2</sub> B-YZ-R          | GCGGAGCGAGGATAAGCATT                                      |                                     |
| EGFP-Probe-F                   | ACGTAAACGGCCACAAGTTC                                      | Southern blotting verification      |
| EGFP-Probe-R                   | TGCTCAGGTAGTGGTTGTCG                                      |                                     |
| RT-GFP-F                       | GGTGAACCTCAAGATCCGCC                                      | Analysis of RT-PCR                  |
| RT-GFP-R                       | CTTGTACAGCTCGTCCATGC                                      |                                     |
| RT-β-tublin-F                  | TCGGTGGAGGTACTGGTT                                        | Analysis of RT-PCR                  |
| RT-β-tublin-R                  | GAGTGTTCGAGGGTGGTG                                        |                                     |

## 2. Supplementary figures

**Figure S1.** Analysis of *A. oligospora* digestive nematodes. (A) Fluorescence observation of mature nematode captured by fungi in different planes. Yellow arrow: *C. elegans*. Blue arrow: traps. Bar: 100  $\mu\text{m}$ . (B) Fluorescence observation of young adult nematode captured by fungi in different planes. Yellow arrow: *C. elegans*. Blue arrow: traps. Bar: 100  $\mu\text{m}$ . (C) The traps and captured nematodes of the H<sub>2</sub>B positive strains were observed via SEM. Left: Traps captured a large number of nematodes. Yellow arrow: the captured nematodes. Blue arrow: conidium. Bar: 500  $\mu\text{m}$ . Right: An enlarged schematic of the red dashed box in the left image. Through SEM analysis, it was found that the mycelium had entered the nematode body. Red arrow: the outline of nematode. Bar: 50  $\mu\text{m}$ . (D) Hyphae were stained with CFW, and traps of the H<sub>2</sub>B positive strains were observed. Red arrow: septum.

**Figure S2.** Comparison of mycelial growth between wild type (WT) and H<sub>2</sub>B positive strains. (A) Colonial morphologies of WT and H<sub>2</sub>B positive strains incubated on PDA, TYGA, TG, CMY and CMA medium at 28°C for 5 days. Due to the sparse hyphae on CMA media, the edges of the colonies are marked with red circles. (B) The mycelial growth rate of WT and H<sub>2</sub>B positive strains cultured on five different media in Figure S2A. The number after H<sub>2</sub>B represents three independent H<sub>2</sub>B positive strains.

**Figure S3.** Comparison of conidiation, trap formation and nematicidal activity in WT and H<sub>2</sub>B positive strains. (A) The conidial yields of WT and H<sub>2</sub>B positive strains. (B) Comparison of the spore germination of WT and H<sub>2</sub>B positive strains at 4, 8, and 12 h. (C) Comparison of traps produced by WT and H<sub>2</sub>B positive strains. (D) Comparison of nematode mortality caused by WT and H<sub>2</sub>B positive strains. Error bars represent the standard deviations. Ns: No significant difference (Tukey's HSD,  $P > 0.05$ ).

**Figure S4.** Observation of the formation process of traps of H<sub>2</sub>B positive transformants. (A) Observation the induction of H<sub>2</sub>B positive transformants by nematodes to produce a large number of traps. White arrow: traps. Bar: 50  $\mu\text{m}$ . (B) Based on Figure S4A, SEM observations were conducted on the hyphae, traps, and captured nematodes. WT data unshown. Red arrow: conidium. Yellow arrow: septum. (C) Observation of the formation process of traps. White arrow: traps. Red arrow: the extended trap cell loop. Bar: 100  $\mu\text{m}$ . (D) Fluorescence observation after 48 hours of spore germination. White arrow: traps. Blue arrow: hypha. Bar: 200  $\mu\text{m}$ .

**Figure S5.** Analysis of conidiophore and germination tube of H<sub>2</sub>B positive strains. (A) Morphological observation of conidium and conidiophore via white light. Bar: 200  $\mu\text{m}$ . (B) The conidium and conidiophore were observed laterally by fluorescence microscope. Bar: 100  $\mu\text{m}$ . (C) Observation of conidium and conidiophore from above. Bar: 100  $\mu\text{m}$ . Yellow arrow: conidiophore. Red arrow: conidium. (D) Conidium sprouted a mycelium. (E) Conidium sprouted two hyphae. (F) Conidium sprouted three hyphae. Bar: 50  $\mu\text{m}$ .

Red arrow: conidium. Black arrow: hyphae.

**Figure S6.** Analysis of nuclear localization at the tip of hyphae. **(A)** Fluorescence observation of the nucleus at the tip of the hyphae. Yellow arrow: septum. Red arrow: the nucleus near the tip of the hyphae. Bar: 25  $\mu\text{m}$ . **(B)** The nucleus migrates towards the tip of the hyphae. **(C)** The nucleus migrates in the opposite direction to the tip of the hyphae. **(D)** After nuclear migration, there is a nucleus at the tip of the hyphae. **(E)** Analysis of nuclear localization at the tip of branching hyphae. Blue arrow: direction of nuclear migration. Red arrow: the nucleus near the tip of the hyphae. White triangle: the tip of the hyphae. Bar: 100  $\mu\text{m}$ .

### 3. Supplementary videos

**Video S1.** Observation of traps capturing nematodes. Red arrow: traps. Yellow arrow: nematode eggs. Bar: 500  $\mu\text{m}$ . The video was played at 100 $\times$  speed.

**Video S2.** Spatial imaging analysis of traps based on EGFP.

**Video S3.** Analysis of nuclear behavior interaction between conidium and hyphal cells. Red arrow: conidium. Bar: 200  $\mu\text{m}$ . The video was played at 100 $\times$  speed.

**Video S4.** The nuclei evenly distributed in the mycelium were moving. Bar: 100  $\mu\text{m}$ . White dotted line: hyphal outline. The video was played at 100 $\times$  speed.

**Video S5.** Observation of nuclear division in hypha. Red arrow: the nucleus involved in division. Bar: 100  $\mu\text{m}$ . The video was played at 150 $\times$  speed.

**Video S6.** Nuclear behavior in the hyphal cells of H2B-EGFP-labeled strain. The nucleus could cross the adjacent nucleus and migrated to the tip of hypha. Red arrow: the nucleus that was crossed. Bar: 100  $\mu\text{m}$ . The video was played at 100 $\times$  speed.

**Video S7.** Analysis of nuclear migration in branching hyphae. Red arrow: migrated nucleus. Bar: 60  $\mu\text{m}$ . White dotted line: hyphal outline. The video was played at 100 $\times$  speed.

**Video S8.** Rapid migration of nuclei in mycelium. Red arrow: Rapidly migrated nuclei. Bar: 50  $\mu\text{m}$ . White dotted line: hyphal outline. The video was played at 100 $\times$  speed.
