# Supplementary material for: Analysis of Nuclear Dynamics in Nematode-Trapping Fungi Based on Fluorescent Protein Labeling
Source: J Fungi (Basel). 2023 Dec 11;9(12):1183. doi: 10.3390/jof9121183 (PMC10744682; doi:10.3390/jof9121183)
Supplement: Supplementary file 1 [file jof-09-01183-s001.zip]

Archive with 15 entries (15 files):
- (annotation) Supplementary Table, Figures and Videos.pdf
- Supplementary Figure S1.tif
- Supplementary Figure S2.tif
- Supplementary Figure S3.tif
- Supplementary Figure S4.tif
- Supplementary Figure S5.tif
- Supplementary Figure S6.tif
- Supplementary vedio S1.mp4
- Supplementary vedio S2.mp4
- Supplementary vedio S3.mp4
- Supplementary vedio S4.mp4
- Supplementary vedio S5.mp4
- Supplementary vedio S6.mp4
- Supplementary vedio S7.mp4
- Supplementary vedio S8.mp4
